# Supplementary material
Source: Springer Nature journal article supplement (https://www.springermedizin.de/resource/supplementary/13099_2012_65_MOESM6_ESM.pdf/9665478)

**A** Vehicle/*No C. difficile*

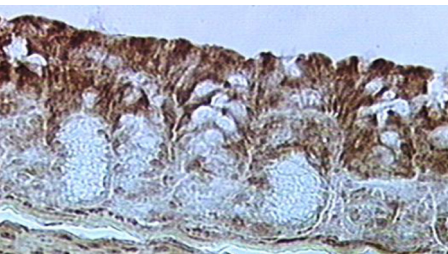

**B** Vehicle/*C. difficile*/Vanco

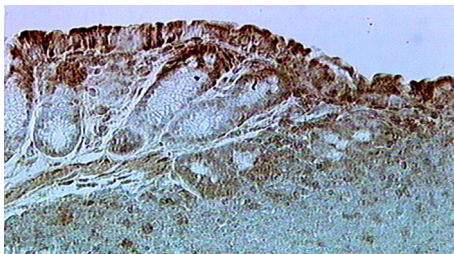

**C** BC30/*C. difficile*/Vanco

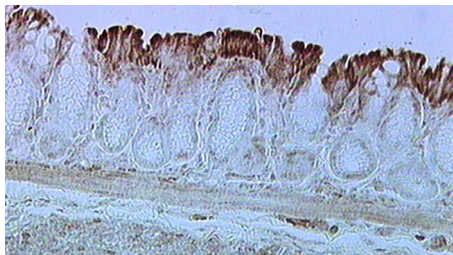

Supplement: MOESM6 [file 9665478]
